# Supplementary material
Source: Springer Nature journal article supplement (https://www.springermedizin.de/resource/supplementary/13075_2011_3543_MOESM3_ESM.pdf/9694772)

## CD4+ T-cells

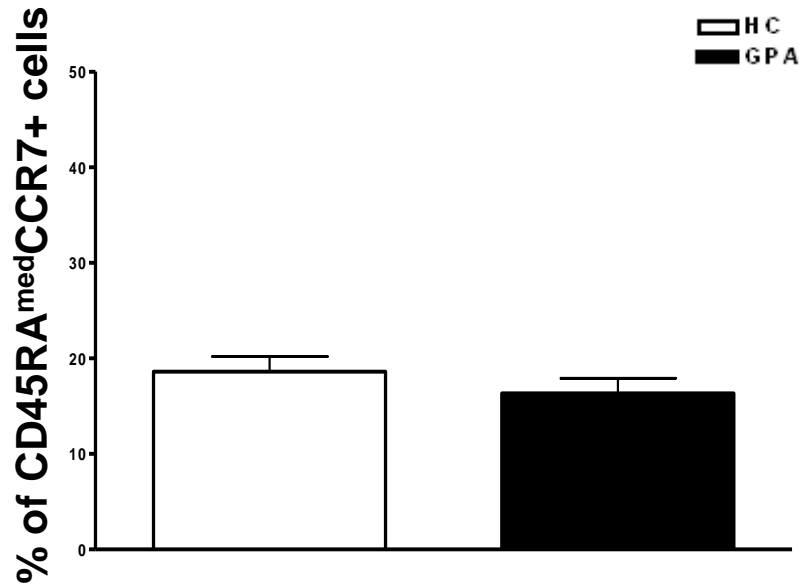

## CD4+ T-cells

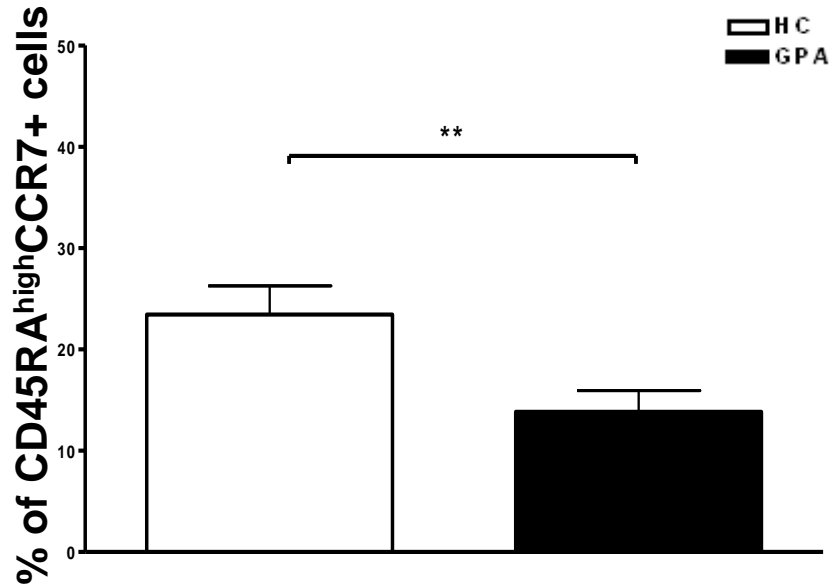

Supplement: MOESM3 [file 9694772]
